# Supplementary material for: Characterization of Volatile Compounds by HS-GC-IMS and Chemical Composition Analysis of Colored Highland Barley Roasted at Different Temperatures
Source: MDPI journal article supplement (doi:10.3390/foods11182921), 2022-09-19
Supplement: s1 [file s1]

## Supplemental Materials

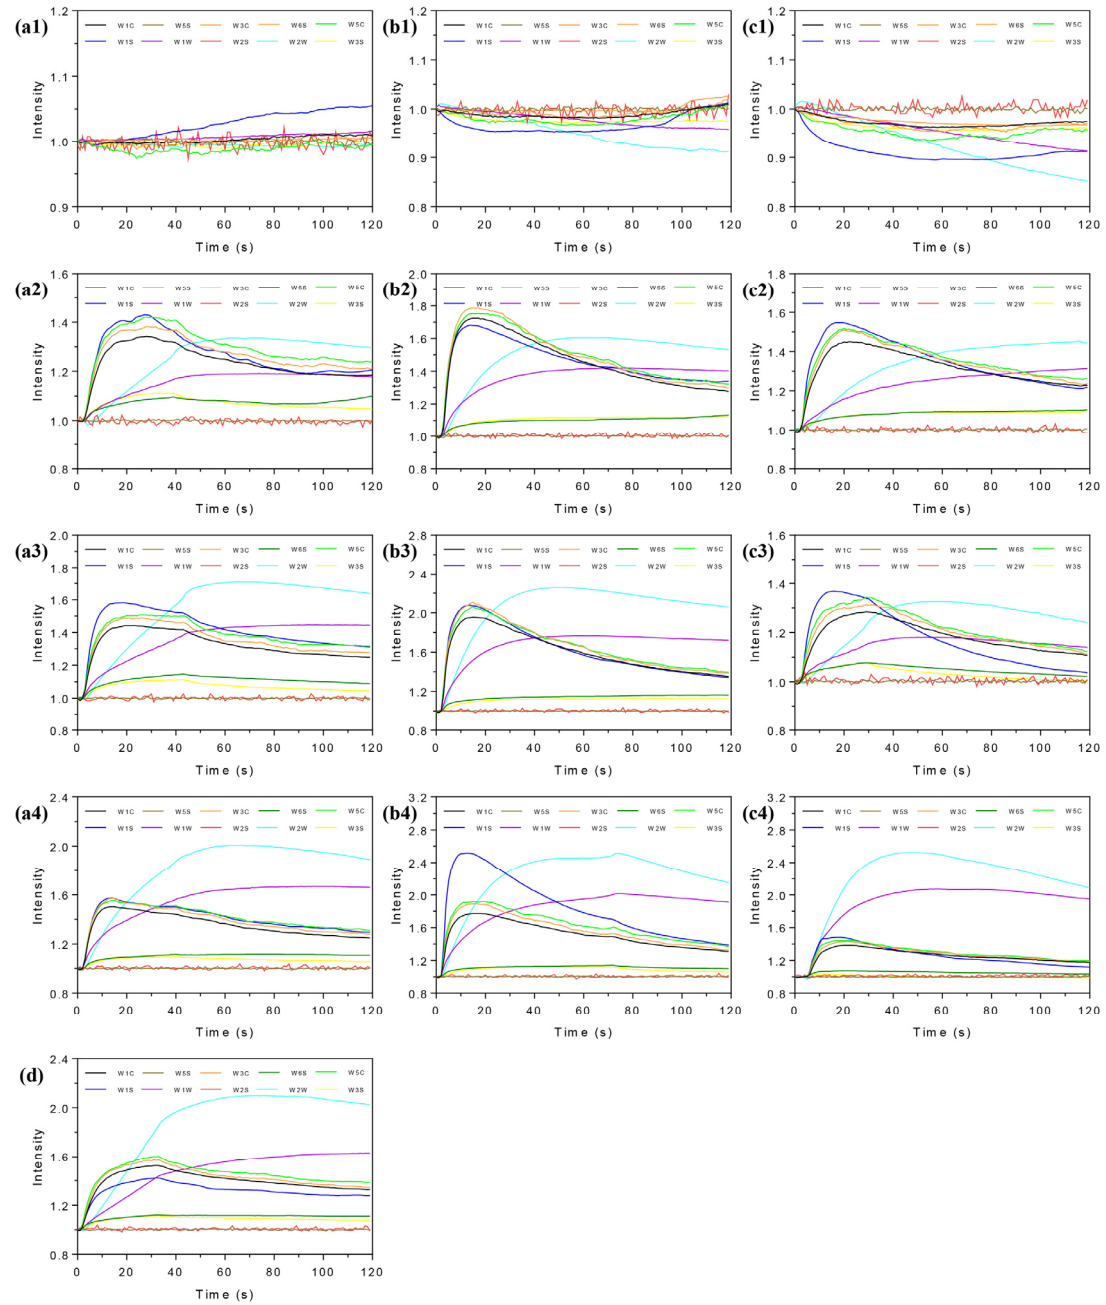

**F**

**Figure S1** Ten sensors' responses to the aromas attributed by the E-nose in the raw and CHB roasted at different temperatures. a (white): a1 (0.0 °C); a2 (180.0 °C); a3 (220.0 °C); a4 (260.0 °C). b (blue):

b1 (0.0 °C); b2 (180.0 °C); b3 (220.0 °C); b4 (260.0 °C). c (black): c1 (0.0 °C); c2 (180.0 °C); c3 (220.0 °C); c4 (260.0 °C). d: commercial roasted barley.

**a**

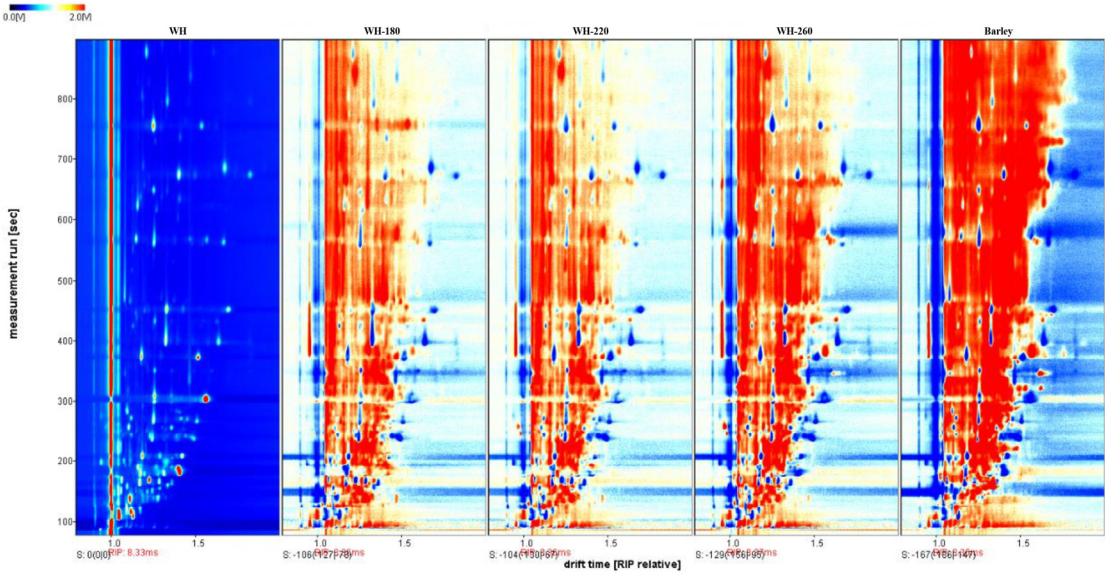

**b**

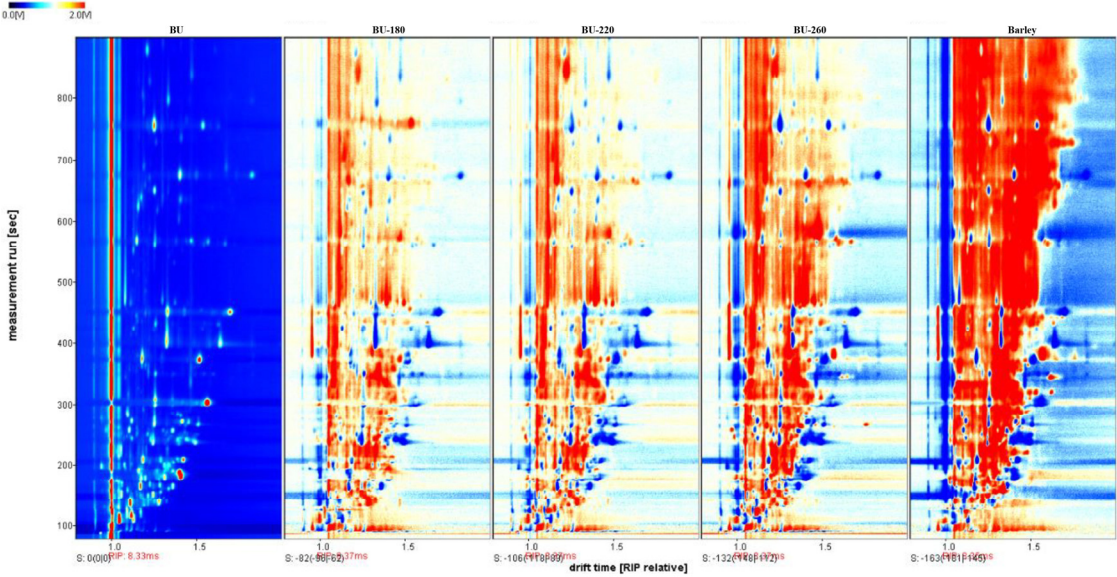

c

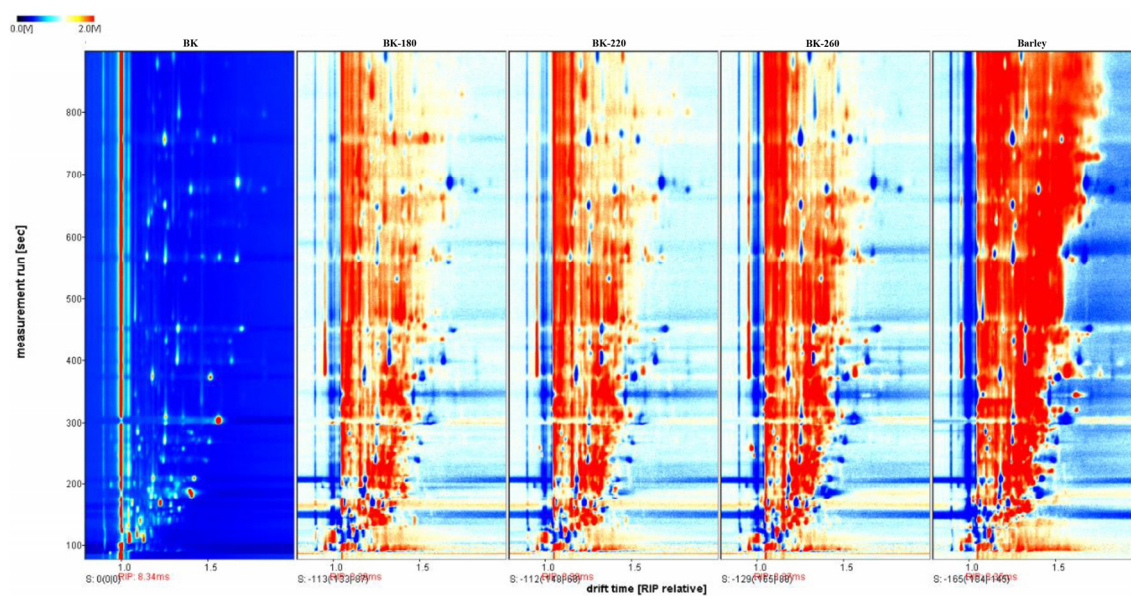

**Figure S2** HS-GC-IMS topographic plots for the raw and CHB roasted at different temperatures. a: white cultivar; b: blue cultivar; c: black cultivar. Commercial roasted barley was set as the control.

## Tables

**Table S1** The main applications of sensors in PEN3.

| Numbers | Sensor name | Substances for sensing                                                             | Reference                                     |
|---------|-------------|------------------------------------------------------------------------------------|-----------------------------------------------|
| 1       | W1C         | Aromatic compounds                                                                 | Toluene, 10 ppm                               |
| 2       | W5S         | Nitrogen oxides                                                                    | NO <sub>2</sub> , 1 ppm                       |
| 3       | W3C         | Ammonia, Aromatic compounds                                                        | Benzene, 10 ppm                               |
| 4       | W6S         | Hydrogen                                                                           | H <sub>2</sub> , 100 ppb                      |
| 5       | W5C         | Alkanes, Less polar compounds                                                      | Propane, 1 ppm                                |
| 6       | W1S         | Sensitive to methane (environment) <i>ca.</i> 10 ppm, Broad range, similar to No.8 | CH <sub>4</sub> , 100 ppm                     |
| 7       | W1W         | Sulfur compounds, H <sub>2</sub> S 0.1 ppm, Terpenes, Sulfur organic compounds     | H <sub>2</sub> S, 1 ppm                       |
| 8       | W2S         | Alcohols, Partially aromatic compounds, Broad range                                | CO, 100 ppm                                   |
| 9       | W2W         | Aromatic compounds, Sulfur organic compounds                                       | H <sub>2</sub> S, 1 ppm                       |
| 10      | W3S         | Methane at high concentrations > 100 ppm, Sometimes very selective                 | CH <sub>4</sub> , 10CH <sub>4</sub> , 100 ppm |
